# Supplementary material for: Genetic Susceptibility of ACE2 and TMPRSS2 in Six Common Cancers and Possible Impacts on COVID-19
Source: PubMed Central journal article supplement — Cancer Res Treat. 2020 Dec 29;53(3):650–6. doi: 10.4143/crt.2020.950 (PMC8291170; doi:10.4143/crt.2020.950), 2020-12-29
Supplement: crt-2020-950-suppl1.pdf [file crt-2020-950-suppl1.pdf]

**S1 Table.** Top 100 similar genes of ACE2 in six tumor types

| LUAD                  |      | BRCA                 |      | COAD               |      | PRAD                 |      | STAD                 |      | LIHC                 |      |
|-----------------------|------|----------------------|------|--------------------|------|----------------------|------|----------------------|------|----------------------|------|
| Gene symbol           | PCC  | Gene symbol          | PCC  | Gene symbol        | PCC  | Gene symbol          | PCC  | Gene symbol          | PCC  | Gene symbol          | PCC  |
| <i>RP11-430C1.1</i>   | 0.79 | <i>FABP7</i>         | 0.63 | <i>KB-1732A1.1</i> | 0.58 | <i>CTB-35F21.5</i>   | 0.79 | <i>MTTP</i>          | 0.48 | <i>PAGE4</i>         | 0.51 |
| <i>RP11-667K14.10</i> | 0.79 | <i>SULT1C2P1</i>     | 0.6  | <i>PLA2G12B</i>    | 0.58 | <i>LCE1F</i>         | 0.79 | <i>SLC23A3</i>       | 0.45 | <i>AC142528.1</i>    | 0.49 |
| <i>HTR3B</i>          | 0.76 | <i>DNAJC19P3</i>     | 0.57 | <i>CEBPA</i>       | 0.57 | <i>AL357874.1</i>    | 0.79 | <i>RP3-417L20.4</i>  | 0.41 | <i>GS1-594A7.3</i>   | 0.46 |
| <i>AC000124.1</i>     | 0.74 | <i>RN7SL564P</i>     | 0.57 | <i>OIT3</i>        | 0.56 | <i>IGLVVI-25-1</i>   | 0.79 | <i>HNF4A-AS1</i>     | 0.41 | <i>MIR325HG</i>      | 0.45 |
| <i>SCARNA24</i>       | 0.72 | <i>RP11-755B10.3</i> | 0.57 | <i>RPS6KA6</i>     | 0.56 | <i>SNORA12</i>       | 0.79 | <i>GDPD2</i>         | 0.4  | <i>RP11-538D16.2</i> | 0.44 |
| <i>LINC00371</i>      | 0.7  | <i>HSD3BP2</i>       | 0.56 | <i>SRPX2</i>       | 0.55 | <i>CTB-113I20.1</i>  | 0.79 | <i>LGALS14</i>       | 0.4  | <i>CEACAMP10</i>     | 0.44 |
| <i>OR7E83P</i>        | 0.69 | <i>RP11-8P11.4</i>   | 0.56 | <i>TP53RK</i>      | 0.54 | <i>RP11-254I22.3</i> | 0.76 | <i>TMPRSS15</i>      | 0.4  | <i>RP11-373D7.1</i>  | 0.44 |
| <i>TRPM1</i>          | 0.64 | <i>RP11-643A5.2</i>  | 0.55 | <i>CSE1L</i>       | 0.54 | <i>RNA5SP78</i>      | 0.74 | <i>LRRC19</i>        | 0.39 | <i>FBXO31</i>        | 0.43 |
| <i>RP11-603J24.4</i>  | 0.64 | <i>RP11-80F22.10</i> | 0.55 | <i>PLAGL2</i>      | 0.53 | <i>DNAJA1P5</i>      | 0.72 | <i>AQP11</i>         | 0.38 | <i>TRAPPC13P1</i>    | 0.43 |
| <i>RP11-283I3.2</i>   | 0.64 | <i>ADAD2</i>         | 0.55 | <i>CASK</i>        | 0.53 | <i>SERPINA10</i>     | 0.69 | <i>RP11-322E11.2</i> | 0.38 | <i>CTD-2366F13.1</i> | 0.42 |

|                      |      |                       |      |                      |      |                    |      |                       |      |                      |      |
|----------------------|------|-----------------------|------|----------------------|------|--------------------|------|-----------------------|------|----------------------|------|
| <i>RP11-188I24.1</i> | 0.62 | <i>NOTO</i>           | 0.54 | <i>MOCS3</i>         | 0.53 | <i>AC079951.1</i>  | 0.69 | <i>SLC28A1</i>        | 0.38 | <i>ZNF648</i>        | 0.41 |
| <i>RP11-561C5.1</i>  | 0.62 | <i>OXER1</i>          | 0.54 | <i>TSPAN6</i>        | 0.53 | <i>Metazoa_SRP</i> | 0.68 | <i>MS4A10</i>         | 0.37 | <i>SLC16A12-ASI</i>  | 0.41 |
| <i>RP11-148B3.2</i>  | 0.6  | <i>GMCLIP2</i>        | 0.53 | <i>RPS6KA3</i>       | 0.53 | <i>RNU1-95P</i>    | 0.68 | <i>MYL3</i>           | 0.37 | <i>RP11-15B24.5</i>  | 0.41 |
| <i>KLB</i>           | 0.59 | <i>RP11-59D5__B.2</i> | 0.53 | <i>POFUT1</i>        | 0.52 | <i>RNU1-128P</i>   | 0.68 | <i>KNG1</i>           | 0.37 | <i>MME-AS1</i>       | 0.4  |
| <i>CHCHD2P5</i>      | 0.59 | <i>RP3-461F17.2</i>   | 0.53 | <i>ABCC6P2</i>       | 0.52 | <i>RTTN</i>        | 0.65 | <i>CDHR5</i>          | 0.37 | <i>RP11-711C17.2</i> | 0.4  |
| <i>HNRNPA1P15</i>    | 0.58 | <i>AC018865.11</i>    | 0.53 | <i>ID1</i>           | 0.52 | <i>LHX3</i>        | 0.62 | <i>OR7E101P</i>       | 0.37 | <i>NUBPL</i>         | 0.4  |
| <i>RP6-43L17.2</i>   | 0.55 | <i>RP11-359D14.2</i>  | 0.52 | <i>RP11-150O12.3</i> | 0.52 | <i>BRS3</i>        | 0.62 | <i>RP11-468N14.09</i> | 0.37 | <i>CNN2P6</i>        | 0.4  |
| <i>RP11-427J23.1</i> | 0.55 | <i>RP11-294C11.3</i>  | 0.52 | <i>PRR15</i>         | 0.52 | <i>SGK2</i>        | 0.61 | <i>MIR543</i>         | 0.37 | <i>RP4-601P9.2</i>   | 0.4  |
| <i>AC008072.1</i>    | 0.55 | <i>HAAO</i>           | 0.51 | <i>SLC2A8</i>        | 0.52 | <i>FLJ22763</i>    | 0.6  | <i>AC007436.1</i>     | 0.37 | <i>CTD-2337A12.1</i> | 0.39 |
| <i>RP5-1097F14.1</i> | 0.54 | <i>RN7SL549P</i>      | 0.5  | <i>PXMP4</i>         | 0.51 | <i>BTNL2</i>       | 0.6  | <i>Y_RNA</i>          | 0.37 | <i>MAOB</i>          | 0.39 |
| <i>AP001891.1</i>    | 0.52 | <i>HIGD1AP3</i>       | 0.5  | <i>NFS1</i>          | 0.51 | <i>AC018832.1</i>  | 0.6  | <i>AC103996.1</i>     | 0.37 | <i>CTD-2377O17.1</i> | 0.39 |

|                     |      |                     |      |                      |      |                      |      |                      |      |                       |      |
|---------------------|------|---------------------|------|----------------------|------|----------------------|------|----------------------|------|-----------------------|------|
| <i>MIR320B2</i>     | 0.51 | <i>ACHE</i>         | 0.5  | <i>C20orf24</i>      | 0.51 | <i>GTF3AP1</i>       | 0.6  | <i>AF254983.1</i>    | 0.37 | <i>RP4-575N6.4</i>    | 0.39 |
| <i>PCDH11X</i>      | 0.51 | <i>CES1P1</i>       | 0.5  | <i>PSMA7</i>         | 0.51 | <i>DGAT2</i>         | 0.59 | <i>LINC01198</i>     | 0.37 | <i>DSG1</i>           | 0.39 |
| <i>MTND4P11</i>     | 0.5  | <i>STAG3</i>        | 0.49 | <i>AC106876.2</i>    | 0.51 | <i>OSTN-AS1</i>      | 0.58 | <i>MEP1B</i>         | 0.36 | <i>HIBADH</i>         | 0.38 |
| <i>RP1-67K17.4</i>  | 0.5  | <i>AADAT</i>        | 0.49 | <i>EIF2S2</i>        | 0.51 | <i>RP11-475J5.11</i> | 0.57 | <i>TMEM114</i>       | 0.36 | <i>AMER1</i>          | 0.38 |
| <i>RP11-173E2.2</i> | 0.49 | <i>RP11-567C2.1</i> | 0.48 | <i>GGH</i>           | 0.5  | <i>FGL1</i>          | 0.56 | <i>RP11-394A14.4</i> | 0.36 | <i>RP11-431J24.2</i>  | 0.38 |
| <i>RN7SL111P</i>    | 0.48 | <i>RP11-47I22.1</i> | 0.48 | <i>ZSWIM3</i>        | 0.5  | <i>RP11-407A16.7</i> | 0.56 | <i>PLAGL2</i>        | 0.36 | <i>RP11-428K3.1</i>   | 0.38 |
| <i>AOX3P</i>        | 0.48 | <i>RP11-26F2.2</i>  | 0.48 | <i>ROMO1</i>         | 0.5  | <i>UGT1A1</i>        | 0.56 | <i>SLC17A4</i>       | 0.36 | <i>RNU1-95P</i>       | 0.38 |
| <i>ABCB11</i>       | 0.48 | <i>CTB-55O6.4</i>   | 0.48 | <i>EPDR1</i>         | 0.5  | <i>AP000641.1</i>    | 0.56 | <i>RBMY2CP</i>       | 0.35 | <i>RNU1-128P</i>      | 0.38 |
| <i>RP11-65J21.4</i> | 0.48 | <i>RP5-837I24.2</i> | 0.48 | <i>DPM1</i>          | 0.5  | <i>FAM87A</i>        | 0.55 | <i>RBMY2DP</i>       | 0.35 | <i>AC009237.13</i>    | 0.38 |
| <i>RP11-672A2.1</i> | 0.48 | <i>IGLV4-60</i>     | 0.47 | <i>JADE3</i>         | 0.5  | <i>RP1-167G20.2</i>  | 0.55 | <i>FABP1</i>         | 0.35 | <i>RP11-170L3.6</i>   | 0.38 |
| <i>CYCSP5</i>       | 0.48 | <i>CTNNA2</i>       | 0.47 | <i>PRPS2</i>         | 0.49 | <i>RP11-442J17.3</i> | 0.55 | <i>AC068535.3</i>    | 0.35 | <i>MIR1306</i>        | 0.38 |
| <i>RP11-86H7.6</i>  | 0.47 | <i>ZNF812</i>       | 0.47 | <i>GS1-594A7.3</i>   | 0.49 | <i>AC062020.1</i>    | 0.55 | <i>OTOF</i>          | 0.35 | <i>PFN1P12</i>        | 0.38 |
| <i>FAM177A1P1</i>   | 0.47 | <i>PGC</i>          | 0.47 | <i>RP11-243A14.1</i> | 0.49 | <i>COX6B1P6</i>      | 0.54 | <i>PCK2</i>          | 0.35 | <i>RP11-344N17.11</i> | 0.38 |
| <i>LINC01442</i>    | 0.47 | <i>GGT1</i>         | 0.46 | <i>AHCY</i>          | 0.49 | <i>PRR35</i>         | 0.53 | <i>FLJ22763</i>      | 0.35 | <i>AC009238.8</i>     | 0.38 |

|                      |      |                      |      |                 |      |                      |      |                      |      |                      |      |
|----------------------|------|----------------------|------|-----------------|------|----------------------|------|----------------------|------|----------------------|------|
| <i>GREB1</i>         | 0.47 | <i>UNCX</i>          | 0.46 | <i>AURKA</i>    | 0.49 | <i>CDH17</i>         | 0.53 | <i>HNFA4</i>         | 0.35 | <i>AL592211.1</i>    | 0.38 |
| <i>CTD-2318B16.2</i> | 0.46 | <i>SMPDL3A</i>       | 0.46 | <i>SLC5A6</i>   | 0.49 | <i>RP11-503D12.1</i> | 0.52 | <i>CTD-2542C24.2</i> | 0.34 | <i>CTD-2358C21.3</i> | 0.38 |
| <i>BHLHB9P1</i>      | 0.46 | <i>RP11-705O24.3</i> | 0.46 | <i>SCARB1</i>   | 0.49 | <i>RP11-412B14.1</i> | 0.52 | <i>AL592546.1</i>    | 0.34 | <i>MME</i>           | 0.38 |
| <i>RN7SL817P</i>     | 0.46 | <i>CTD-2382H12.1</i> | 0.45 | <i>SATB2</i>    | 0.49 | <i>RP11-159K7.2</i>  | 0.52 | <i>ACMSD</i>         | 0.34 | <i>RGSL1</i>         | 0.38 |
| <i>AC007390.4</i>    | 0.46 | <i>OR2W5</i>         | 0.45 | <i>SYAP1</i>    | 0.49 | <i>KB-1247B1.1</i>   | 0.52 | <i>SSXP10</i>        | 0.34 | <i>GCC2-AS1</i>      | 0.38 |
| <i>MTURN</i>         | 0.46 | <i>NF1P5</i>         | 0.45 | <i>RALY</i>     | 0.49 | <i>RP11-390N6.1</i>  | 0.51 | <i>CTC-400I9.2</i>   | 0.34 | <i>RP4-601P9.1</i>   | 0.38 |
| <i>RP11-556I14.1</i> | 0.45 | <i>AQP12B</i>        | 0.45 | <i>AGT</i>      | 0.49 | <i>RP13-128O4.3</i>  | 0.51 | <i>ADAM18</i>        | 0.34 | <i>ECM2</i>          | 0.38 |
| <i>BFSP1</i>         | 0.45 | <i>RP4-710M16.2</i>  | 0.44 | <i>HSD17B10</i> | 0.49 | <i>METTL7B</i>       | 0.51 | <i>CEBPA</i>         | 0.34 | <i>GLI2</i>          | 0.37 |
| <i>GLIS2-AS1</i>     | 0.45 | <i>MUCL1</i>         | 0.44 | <i>MAP7D2</i>   | 0.49 | <i>RP11-543H23.2</i> | 0.5  | <i>TSPAN6</i>        | 0.33 | <i>CDC14B</i>        | 0.37 |
| <i>RP11-556I14.2</i> | 0.45 | <i>RP11-17A4.2</i>   | 0.43 | <i>SLC19A3</i>  | 0.48 | <i>CES5A</i>         | 0.5  | <i>SALL4</i>         | 0.33 | <i>SGCZ</i>          | 0.37 |
| <i>NPNT</i>          | 0.44 | <i>C9orf92</i>       | 0.43 | <i>MFAP3L</i>   | 0.48 | <i>RP13-238F13.3</i> | 0.49 | <i>YWHABP2</i>       | 0.33 | <i>RP11-37C7.1</i>   | 0.37 |
| <i>SSU72P8</i>       | 0.44 | <i>TBC1D32</i>       | 0.43 | <i>TAF4</i>     | 0.48 | <i>ABCD1</i>         | 0.49 | <i>SPATA31A5</i>     | 0.33 | <i>MGC32805</i>      | 0.37 |

|                      |      |                    |      |                 |      |                      |      |                       |      |                      |      |
|----------------------|------|--------------------|------|-----------------|------|----------------------|------|-----------------------|------|----------------------|------|
| <i>RP11-690C23.3</i> | 0.44 | <i>CLDN8</i>       | 0.43 | <i>DDX27</i>    | 0.48 | <i>Y_RNA</i>         | 0.49 | <i>RP13-16H11.2</i>   | 0.33 | <i>TPRG1-AS1</i>     | 0.37 |
| <i>RP11-305L7.1</i>  | 0.43 | <i>RLN3</i>        | 0.43 | <i>TMLHE</i>    | 0.48 | <i>SMARCA1</i>       | 0.48 | <i>TRI-TAT2-2</i>     | 0.33 | <i>AP000431.2</i>    | 0.37 |
| <i>CH17-13I23.1</i>  | 0.43 | <i>EMILIN3</i>     | 0.42 | <i>PPP1R14D</i> | 0.48 | <i>ASZ1</i>          | 0.48 | <i>NAP1L6</i>         | 0.33 | <i>TRAM2-AS1</i>     | 0.37 |
| <i>RP11-138A9.1</i>  | 0.43 | <i>FABP6</i>       | 0.42 | <i>DGAT2</i>    | 0.48 | <i>RP11-1137G4.3</i> | 0.48 | <i>ADGRG7</i>         | 0.33 | <i>SEPT4</i>         | 0.37 |
| <i>CDNF</i>          | 0.43 | <i>LINC00624</i>   | 0.42 | <i>DBI</i>      | 0.48 | <i>LINC00415</i>     | 0.47 | <i>RNU6ATAC10P</i>    | 0.33 | <i>RP1-81D8.3</i>    | 0.37 |
| <i>RP11-655M14.4</i> | 0.43 | <i>ATP13A4</i>     | 0.41 | <i>PLEKHG6</i>  | 0.48 | <i>CTD-2194D22.1</i> | 0.47 | <i>SCARNA20</i>       | 0.33 | <i>CAMK2A</i>        | 0.37 |
| <i>ACSM3</i>         | 0.43 | <i>OR13Z3P</i>     | 0.41 | <i>REPS2</i>    | 0.48 | <i>HSPA2</i>         | 0.47 | <i>LLNLR-249E10.1</i> | 0.33 | <i>ACTG1P2</i>       | 0.37 |
| <i>ALDH6A1</i>       | 0.43 | <i>LINC01093</i>   | 0.41 | <i>TIMM17B</i>  | 0.48 | <i>IFNA16</i>        | 0.47 | <i>C1orf115</i>       | 0.33 | <i>ACTG1P11</i>      | 0.37 |
| <i>RN7SL531P</i>     | 0.43 | <i>TUBBP10</i>     | 0.4  | <i>PGRMC1</i>   | 0.47 | <i>RP11-123K19.1</i> | 0.46 | <i>SSUH2</i>          | 0.33 | <i>CTD-3023L14.2</i> | 0.37 |
| <i>RP11-12A16.3</i>  | 0.42 | <i>CTB-11I22.1</i> | 0.4  | <i>ARSE</i>     | 0.47 | <i>LINC00320</i>     | 0.46 | <i>RP1-45I4.3</i>     | 0.32 | <i>AP001331.1</i>    | 0.37 |
| <i>MIR670HG</i>      | 0.42 | <i>SLC5A11</i>     | 0.4  | <i>YTHDF1</i>   | 0.47 | <i>SNORA25</i>       | 0.46 | <i>CDH9</i>           | 0.32 | <i>RP11-697E23.1</i> | 0.36 |
| <i>MTTP</i>          | 0.42 | <i>APOBEC3AP1</i>  | 0.4  | <i>MAPRE1</i>   | 0.47 | <i>RP11-871F6.3</i>  | 0.46 | <i>SESN2</i>          | 0.32 | <i>HLF</i>           | 0.36 |
| <i>PGBD4P2</i>       | 0.42 | <i>MYOM2</i>       | 0.4  | <i>FITM2</i>    | 0.47 | <i>CLRN3</i>         | 0.45 | <i>C2orf72</i>        | 0.32 | <i>AP000431.1</i>    | 0.36 |
| <i>LMO4</i>          | 0.41 | <i>RP11-</i>       | 0.4  | <i>SLC23A1</i>  | 0.47 | <i>PIR</i>           | 0.45 | <i>CIDEB</i>          | 0.32 | <i>RP11-</i>         | 0.36 |



|                               |      |                    |      |                            |      |                           |      |                     |      |                           |      |
|-------------------------------|------|--------------------|------|----------------------------|------|---------------------------|------|---------------------|------|---------------------------|------|
| <i>TSPAN7</i>                 | 0.39 | <i>RD3L</i>        | 0.38 | <i>SHROOM4</i>             | 0.47 | <i>GRIA4</i>              | 0.43 | <i>PIPOX</i>        | 0.32 | <i>RUNDC3B</i>            | 0.35 |
| <i>XXbac-<br/>BPG249D20.9</i> | 0.39 | <i>AP000354.4</i>  | 0.38 | <i>PIGU</i>                | 0.47 | <i>REEP4</i>              | 0.43 | <i>CLCN5</i>        | 0.32 | <i>LINC00371</i>          | 0.35 |
| <i>LCN12</i>                  | 0.38 | <i>GCNT1P4</i>     | 0.38 | <i>TPX2</i>                | 0.47 | <i>CTD-<br/>2530H12.2</i> | 0.43 | <i>RP11-162D9.3</i> | 0.32 | <i>RP11-<br/>418J17.3</i> | 0.35 |
| <i>RP5-1004I9.1</i>           | 0.38 | <i>MPV17L</i>      | 0.38 | <i>KIF3B</i>               | 0.47 | <i>LYN</i>                | 0.43 | <i>DEFB131</i>      | 0.32 | <i>MRPS18B</i>            | 0.35 |
| <i>RP11-<br/>474I16.8</i>     | 0.38 | <i>DBI</i>         | 0.38 | <i>EDA</i>                 | 0.46 | <i>LINC01270</i>          | 0.43 | <i>Y_RNA</i>        | 0.32 | <i>HSD17B8</i>            | 0.35 |
| <i>RP11-<br/>1000B6.5</i>     | 0.38 | <i>AKR1D1</i>      | 0.38 | <i>TTPA</i>                | 0.46 | <i>CTD-<br/>2521M24.5</i> | 0.43 | <i>RPL23AP6</i>     | 0.32 | <i>ALDH5A1</i>            | 0.35 |
| <i>FTH1P21</i>                | 0.38 | <i>ALOX15B</i>     | 0.38 | <i>VAPB</i>                | 0.46 | <i>RP11-<br/>649E7.8</i>  | 0.43 | <i>Y_RNA</i>        | 0.32 | <i>ACKR2</i>              | 0.35 |
| <i>GUCY2EP</i>                | 0.38 | <i>AC010983.1</i>  | 0.38 | <i>CTD-<br/>2540B15.11</i> | 0.46 | <i>RP11-<br/>561E1.1</i>  | 0.42 | <i>CDH17</i>        | 0.32 | <i>ALAD</i>               | 0.35 |
| <i>RP11-297N6.4</i>           | 0.38 | <i>LINC01057</i>   | 0.38 | <i>SHROOM2</i>             | 0.46 | <i>MIR6740</i>            | 0.42 | <i>RHOXF1-AS1</i>   | 0.31 | <i>U3</i>                 | 0.34 |
| <i>MAOA</i>                   | 0.38 | <i>AC007136.1</i>  | 0.38 | <i>PUS10</i>               | 0.46 | <i>CNIH4</i>              | 0.42 | <i>RBP2</i>         | 0.31 | <i>PEBP1P2</i>            | 0.34 |
| <i>LINC00706</i>              | 0.37 | <i>RP11-63E9.1</i> | 0.37 | <i>COMMD7</i>              | 0.46 | <i>AKR1C3</i>             | 0.42 | <i>BTNL3</i>        | 0.31 | <i>UGDH-AS1</i>           | 0.34 |
| <i>MSLN</i>                   | 0.37 | <i>SPINK8</i>      | 0.37 | <i>CTNBL1</i>              | 0.46 | <i>RP11-<br/>222K16.2</i> | 0.42 | <i>ZG16</i>         | 0.31 | <i>CPPED1</i>             | 0.34 |
| <i>CDS2</i>                   | 0.37 | <i>SNORA70</i>     | 0.37 | <i>LINC01555</i>           | 0.46 | <i>GSI-594A7.3</i>        | 0.41 | <i>SLC26A3</i>      | 0.31 | <i>NFIX</i>               | 0.34 |
| <i>NUDT7</i>                  | 0.37 | <i>EPHB4</i>       | 0.37 | <i>GPC4</i>                | 0.46 | <i>QSOX1</i>              | 0.41 | <i>AC008581.1</i>   | 0.31 | <i>CUX2</i>               | 0.34 |

|                      |      |                      |      |                |      |                     |      |                      |      |                       |      |
|----------------------|------|----------------------|------|----------------|------|---------------------|------|----------------------|------|-----------------------|------|
| <i>AC004069.1</i>    | 0.37 | <i>LINC00229</i>     | 0.37 | <i>DDX52</i>   | 0.46 | <i>U3</i>           | 0.41 | <i>SPATA3-AS1</i>    | 0.31 | <i>HIRIP3</i>         | 0.34 |
| <i>LINC00570</i>     | 0.37 | <i>UBE2J1</i>        | 0.37 | <i>TSPY26P</i> | 0.46 | <i>CHCHD7</i>       | 0.41 | <i>KB-1247B1.1</i>   | 0.31 | <i>ICK</i>            | 0.34 |
| <i>RP11-350G8.5</i>  | 0.37 | <i>NCOA7-AS1</i>     | 0.37 | <i>PVR</i>     | 0.46 | <i>PHTF1</i>        | 0.41 | <i>RP11-90D4.3</i>   | 0.31 | <i>RP11-178L8.4</i>   | 0.34 |
| <i>RP11-805L22.2</i> | 0.37 | <i>GS1-594A7.3</i>   | 0.37 | <i>AICF</i>    | 0.46 | <i>SPSB2</i>        | 0.41 | <i>ANKDD1B</i>       | 0.31 | <i>HSD17B4</i>        | 0.34 |
| <i>KRT19P2</i>       | 0.37 | <i>PPBPP1</i>        | 0.37 | <i>ASB9</i>    | 0.46 | <i>APOBEC1</i>      | 0.41 | <i>HAVCRI</i>        | 0.31 | <i>RP11-503C24.3</i>  | 0.34 |
| <i>C16orf58</i>      | 0.36 | <i>AC102948.2</i>    | 0.37 | <i>CHMP4B</i>  | 0.46 | <i>GABPB2</i>       | 0.41 | <i>ZNF223</i>        | 0.31 | <i>RP11-1080G15.2</i> | 0.34 |
| <i>RP11-650L12.2</i> | 0.36 | <i>TXNP2</i>         | 0.37 | <i>BRCC3</i>   | 0.46 | <i>S100A10</i>      | 0.4  | <i>PUS10</i>         | 0.3  | <i>AC093802.1</i>     | 0.34 |
| <i>MEGF9</i>         | 0.36 | <i>EYS</i>           | 0.36 | <i>APEX2</i>   | 0.46 | <i>GZMM</i>         | 0.4  | <i>APOA4</i>         | 0.3  | <i>CCDC170</i>        | 0.34 |
| <i>ZBTB16</i>        | 0.36 | <i>RP11-20B7.1</i>   | 0.36 | <i>ADRM1</i>   | 0.46 | <i>FLYWCH1P1</i>    | 0.4  | <i>MYRFL</i>         | 0.3  | <i>TMEM150C</i>       | 0.34 |
| <i>AC007036.5</i>    | 0.36 | <i>C6orf223</i>      | 0.36 | <i>UBE2V1</i>  | 0.45 | <i>RP11-406D1.2</i> | 0.4  | <i>RP11-724M22.1</i> | 0.3  | <i>RP11-278H7.5</i>   | 0.34 |
| <i>TMEM163</i>       | 0.36 | <i>LINC01511</i>     | 0.36 | <i>SRC</i>     | 0.45 | <i>LINC01271</i>    | 0.4  | <i>ERVWE2</i>        | 0.3  | <i>ACOT13</i>         | 0.33 |
| <i>HYMAI</i>         | 0.36 | <i>CTD-2332E11.2</i> | 0.36 | <i>PCTP</i>    | 0.45 | <i>GPR39</i>        | 0.4  | <i>CBLC</i>          | 0.3  | <i>RP11-95P13.2</i>   | 0.33 |
| <i>RP11-114N19.3</i> | 0.36 | <i>CTB-11I22.2</i>   | 0.36 | <i>PHF20</i>   | 0.45 | <i>FEM1AP2</i>      | 0.4  | <i>CTD-2545H1.2</i>  | 0.3  | <i>ECI2</i>           | 0.33 |

---



ACE2, angiotensin-converting enzyme 2; BRCA, breast invasive carcinoma; COAD, colon adenocarcinoma; LIHC, liver hepatocellular carcinoma; LUAD, lung adenocarcinoma; PCC, Pearson correlation coefficient; PRAD, prostate adenocarcinoma; STAD, stomach adenocarcinoma.
