# Supplementary material for: Genetic Susceptibility of ACE2 and TMPRSS2 in Six Common Cancers and Possible Impacts on COVID-19
Source: PubMed Central journal article supplement — Cancer Res Treat. 2020 Dec 29;53(3):650–6. doi: 10.4143/crt.2020.950 (PMC8291170; doi:10.4143/crt.2020.950), 2020-12-29
Supplement: crt-2020-950-suppl2.pdf [file crt-2020-950-suppl2.pdf]

**S2 Table.** Top 100 similar genes of Tmprss2 in six tumor types

| LUAD                 |      | BRCA                 |      | COAD           |      | PRAD            |      | STAD                 |      | LIHC            |      |
|----------------------|------|----------------------|------|----------------|------|-----------------|------|----------------------|------|-----------------|------|
| Gene symbol          | PCC  | Gene symbol          | PCC  | Gene symbol    | PCC  | Gene symbol     | PCC  | Gene symbol          | PCC  | Gene symbol     | PCC  |
| <i>FAM149A</i>       | 0.64 | <i>KLF5</i>          | 0.46 | <i>TSPAN1</i>  | 0.68 | <i>TMEM63B</i>  | 0.59 | <i>SLC37A1</i>       | 0.53 | <i>CRB3</i>     | 0.62 |
| <i>AP001626.1</i>    | 0.62 | <i>NWD1</i>          | 0.46 | <i>GPA33</i>   | 0.66 | <i>TMBIM6</i>   | 0.57 | <i>CLDN18</i>        | 0.5  | <i>CDC42BPG</i> | 0.57 |
| <i>DOK4</i>          | 0.61 | <i>GPR12</i>         | 0.45 | <i>PTPRH</i>   | 0.66 | <i>SLC45A3</i>  | 0.56 | <i>FUT2</i>          | 0.48 | <i>GTF2IP4</i>  | 0.56 |
| <i>LEFTY2</i>        | 0.59 | <i>RP11-327I22.5</i> | 0.44 | <i>PLS1</i>    | 0.62 | <i>SORD</i>     | 0.56 | <i>SLC41A2</i>       | 0.48 | <i>CDH1</i>     | 0.56 |
| <i>SCTR</i>          | 0.59 | <i>RIPK4</i>         | 0.44 | <i>TMEM54</i>  | 0.62 | <i>FBXO42</i>   | 0.55 | <i>TNFSF13</i>       | 0.48 | <i>DENND1C</i>  | 0.56 |
| <i>LRRC55</i>        | 0.58 | <i>RP11-8L21.1</i>   | 0.43 | <i>HK2</i>     | 0.62 | <i>C1orf210</i> | 0.55 | <i>CPT2</i>          | 0.47 | <i>RIPK4</i>    | 0.55 |
| <i>MEGF11</i>        | 0.56 | <i>RP11-341A11.3</i> | 0.43 | <i>HHLA2</i>   | 0.62 | <i>APLP2</i>    | 0.55 | <i>SLC44A4</i>       | 0.47 | <i>THSD4</i>    | 0.55 |
| <i>RP11-707E21.1</i> | 0.55 | <i>TGM5</i>          | 0.43 | <i>MALL</i>    | 0.61 | <i>SPATA13</i>  | 0.54 | <i>FOXD2</i>         | 0.46 | <i>ELMO3</i>    | 0.54 |
| <i>GDPD2</i>         | 0.55 | <i>LINC01107</i>     | 0.43 | <i>TTC22</i>   | 0.6  | <i>SCAMP2</i>   | 0.54 | <i>SHROOM3</i>       | 0.46 | <i>PDGFD</i>    | 0.54 |
| <i>CTD-2545M3.8</i>  | 0.55 | <i>SNX18P8</i>       | 0.42 | <i>SDCBP2</i>  | 0.6  | <i>TOMIL2</i>   | 0.54 | <i>UNC5CL</i>        | 0.46 | <i>DSCR3</i>    | 0.54 |
| <i>FSD2</i>          | 0.55 | <i>GALR2</i>         | 0.42 | <i>C4orf19</i> | 0.6  | <i>CYB561</i>   | 0.54 | <i>LPCAT3</i>        | 0.46 | <i>TMEM9B</i>   | 0.53 |
| <i>SNORA11</i>       | 0.54 | <i>MAL</i>           | 0.42 | <i>DNM2</i>    | 0.6  | <i>ALDH6A1</i>  | 0.54 | <i>RP11-867G23.8</i> | 0.46 | <i>CTNND1</i>   | 0.53 |
| <i>TAPT1</i>         | 0.54 | <i>PGLYRP3</i>       | 0.42 | <i>SLC37A1</i> | 0.6  | <i>SLC9A2</i>   | 0.53 | <i>PIGR</i>          | 0.45 | <i>ARRDC2</i>   | 0.53 |

|                      |      |                      |      |                |      |                  |      |                 |      |                      |      |
|----------------------|------|----------------------|------|----------------|------|------------------|------|-----------------|------|----------------------|------|
| <i>TEPP</i>          | 0.54 | <i>RHCG</i>          | 0.41 | <i>MYPN</i>    | 0.59 | <i>CPEB3</i>     | 0.53 | <i>PFKL</i>     | 0.45 | <i>APP</i>           | 0.53 |
| <i>HAGLR</i>         | 0.54 | <i>PRB2</i>          | 0.41 | <i>BCL10</i>   | 0.59 | <i>PLIN3</i>     | 0.53 | <i>RBM47</i>    | 0.45 | <i>DIRC2</i>         | 0.53 |
| <i>CFAP221</i>       | 0.54 | <i>RPL23AP11</i>     | 0.41 | <i>XDH</i>     | 0.59 | <i>ZBTB7B</i>    | 0.53 | <i>CASP10</i>   | 0.44 | <i>TMC4</i>          | 0.53 |
| <i>TMEM243</i>       | 0.53 | <i>GCNT3</i>         | 0.41 | <i>BTNL3</i>   | 0.58 | <i>DHTKD1</i>    | 0.53 | <i>EPS8L3</i>   | 0.44 | <i>RP13-580F15.2</i> | 0.52 |
| <i>AC079466.1</i>    | 0.53 | <i>AC104981.1</i>    | 0.41 | <i>PRSS8</i>   | 0.58 | <i>SNX25</i>     | 0.53 | <i>AGPAT3</i>   | 0.44 | <i>WWC1</i>          | 0.52 |
| <i>RAB11FIP2</i>     | 0.53 | <i>KRT77</i>         | 0.4  | <i>CLCA4</i>   | 0.58 | <i>STYK1</i>     | 0.53 | <i>FAM101A</i>  | 0.43 | <i>PLS1</i>          | 0.52 |
| <i>NAPSA</i>         | 0.53 | <i>TMEM213</i>       | 0.4  | <i>B3GALT5</i> | 0.58 | <i>JKAMP</i>     | 0.53 | <i>TNIP1</i>    | 0.43 | <i>DDR1</i>          | 0.52 |
| <i>RP11-173M11.2</i> | 0.52 | <i>SLC9A3</i>        | 0.4  | <i>CEACAM7</i> | 0.58 | <i>DENND1C</i>   | 0.53 | <i>SPTLC2</i>   | 0.43 | <i>SPINT1</i>        | 0.52 |
| <i>MATN3</i>         | 0.52 | <i>SLC4A11</i>       | 0.39 | <i>DUOX2</i>   | 0.58 | <i>ELL2</i>      | 0.52 | <i>ZC3H12A</i>  | 0.43 | <i>MAP4K3</i>        | 0.52 |
| <i>CTD-2006K23.2</i> | 0.52 | <i>APCDD1</i>        | 0.39 | <i>MOB3B</i>   | 0.57 | <i>SETD7</i>     | 0.52 | <i>CCDC47</i>   | 0.43 | <i>TMEM127</i>       | 0.52 |
| <i>HAS3</i>          | 0.51 | <i>RP1-172B20.6</i>  | 0.39 | <i>CDHR5</i>   | 0.57 | <i>DOPEY2</i>    | 0.52 | <i>HID1</i>     | 0.43 | <i>LRP10</i>         | 0.52 |
| <i>CYS1</i>          | 0.51 | <i>AC009784.3</i>    | 0.39 | <i>SLC44A4</i> | 0.57 | <i>PSD4</i>      | 0.52 | <i>PVRL3</i>    | 0.43 | <i>CHST4</i>         | 0.52 |
| <i>SFTA3</i>         | 0.51 | <i>KRT4</i>          | 0.38 | <i>GNAI1</i>   | 0.57 | <i>AKAP1</i>     | 0.52 | <i>PRSS8</i>    | 0.42 | <i>RP11-532F12.5</i> | 0.52 |
| <i>RP11-630D6.1</i>  | 0.51 | <i>PPARGC1B</i>      | 0.38 | <i>RBM47</i>   | 0.57 | <i>HACD3</i>     | 0.52 | <i>FAM109A</i>  | 0.42 | <i>PDZD8</i>         | 0.51 |
| <i>PTPN13</i>        | 0.51 | <i>RP11-146D12.2</i> | 0.37 | <i>MUC13</i>   | 0.57 | <i>DLG2</i>      | 0.52 | <i>CMPK1</i>    | 0.42 | <i>DAB2IP</i>        | 0.51 |
| <i>SLC41A1</i>       | 0.51 | <i>BACE2</i>         | 0.37 | <i>PLAC8</i>   | 0.57 | <i>KIAA0319L</i> | 0.52 | <i>MAG11</i>    | 0.42 | <i>CAPN2</i>         | 0.51 |
| <i>MIR548I2</i>      | 0.51 | <i>KIAA1671</i>      | 0.37 | <i>CCL28</i>   | 0.57 | <i>ERGIC1</i>    | 0.52 | <i>Clorf210</i> | 0.42 | <i>NCR3LG1</i>       | 0.51 |

|                      |      |                      |      |                 |      |                      |      |                 |      |                   |      |
|----------------------|------|----------------------|------|-----------------|------|----------------------|------|-----------------|------|-------------------|------|
| <i>HNF1B</i>         | 0.51 | <i>ANKRD20A2</i>     | 0.36 | <i>CASP5</i>    | 0.57 | <i>TMEM192</i>       | 0.52 | <i>HIP1R</i>    | 0.42 | <i>ANXA4</i>      | 0.51 |
| <i>AC044907.1</i>    | 0.51 | <i>KIT</i>           | 0.36 | <i>KRT20</i>    | 0.57 | <i>SPCS2P4</i>       | 0.52 | <i>ALDH2</i>    | 0.42 | <i>AC004066.3</i> | 0.51 |
| <i>C1orf198</i>      | 0.5  | <i>KCNJ18</i>        | 0.36 | <i>RETSAT</i>   | 0.56 | <i>SNAP23</i>        | 0.52 | <i>TP53I11</i>  | 0.42 | <i>SEL1L3</i>     | 0.51 |
| <i>MGLL</i>          | 0.5  | <i>GXYLT1P3</i>      | 0.35 | <i>TLCD2</i>    | 0.56 | <i>MAP2K4</i>        | 0.52 | <i>RSPH1</i>    | 0.41 | <i>PCDHGA7</i>    | 0.51 |
| <i>KCNK5</i>         | 0.5  | <i>RP11-408N14.1</i> | 0.35 | <i>FUT2</i>     | 0.56 | <i>PAFAH2</i>        | 0.51 | <i>C4orf19</i>  | 0.41 | <i>NPTN</i>       | 0.51 |
| <i>RP11-245J24.1</i> | 0.5  | <i>GJB6</i>          | 0.35 | <i>LRRC1</i>    | 0.56 | <i>SYT7</i>          | 0.51 | <i>PDZK1IP1</i> | 0.41 | <i>CXorf38</i>    | 0.51 |
| <i>AC013275.2</i>    | 0.5  | <i>AC012363.13</i>   | 0.35 | <i>TJP3</i>     | 0.55 | <i>RDH11</i>         | 0.51 | <i>ABCD3</i>    | 0.41 | <i>CMTM4</i>      | 0.51 |
| <i>SNORA26</i>       | 0.5  | <i>KCNJ4</i>         | 0.35 | <i>MIER3</i>    | 0.55 | <i>MAN2B2</i>        | 0.51 | <i>BCL2L15</i>  | 0.41 | <i>AC007246.3</i> | 0.51 |
| <i>SH3RF1</i>        | 0.5  | <i>CTC-327F10.4</i>  | 0.34 | <i>HECTD3</i>   | 0.55 | <i>RP11-1012A1.4</i> | 0.51 | <i>LPIN2</i>    | 0.41 | <i>SUSD6</i>      | 0.5  |
| <i>RP5-988G15.1</i>  | 0.5  | <i>RP11-231E6.1</i>  | 0.34 | <i>C1orf177</i> | 0.55 | <i>NIPAL2</i>        | 0.51 | <i>DNM2</i>     | 0.41 | <i>TGFA</i>       | 0.5  |
| <i>IL6R</i>          | 0.49 | <i>INSR</i>          | 0.34 | <i>CLDN23</i>   | 0.55 | <i>TCAF1</i>         | 0.51 | <i>MOB3B</i>    | 0.41 | <i>GAREM</i>      | 0.5  |
| <i>PRDM16</i>        | 0.49 | <i>CAP2P1</i>        | 0.34 | <i>C11orf86</i> | 0.55 | <i>ERLEC1</i>        | 0.51 | <i>EFHD2</i>    | 0.41 | <i>SH3RF1</i>     | 0.5  |
| <i>RPS2P45</i>       | 0.48 | <i>DIRAS2</i>        | 0.34 | <i>BMP2</i>     | 0.55 | <i>PPM1K</i>         | 0.51 | <i>COPG1</i>    | 0.41 | <i>PRRG4</i>      | 0.5  |
| <i>SHROOM4</i>       | 0.48 | <i>AC006262.5</i>    | 0.34 | <i>DHRS9</i>    | 0.55 | <i>FAM129B</i>       | 0.51 | <i>RASSF7</i>   | 0.41 | <i>KIAA1456</i>   | 0.5  |
| <i>TLR2</i>          | 0.48 | <i>UPK1B</i>         | 0.34 | <i>CDHR2</i>    | 0.54 | <i>LAMP2</i>         | 0.51 | <i>RALGAPA2</i> | 0.41 | <i>CTTNBP2NL</i>  | 0.5  |
| <i>BCRP5</i>         | 0.48 | <i>CYP4F3</i>        | 0.34 | <i>SMPDL3A</i>  | 0.54 | <i>TNFAIP8</i>       | 0.51 | <i>FBLIM1</i>   | 0.41 | <i>CCDC186</i>    | 0.5  |
| <i>NFIX</i>          | 0.48 | <i>C15orf62</i>      | 0.34 | <i>VSIG1</i>    | 0.54 | <i>SCAMP4</i>        | 0.51 | <i>C6orf222</i> | 0.4  | <i>ELOVL7</i>     | 0.5  |
| <i>CRY2</i>          | 0.48 | <i>GPC5-IT1</i>      | 0.33 | <i>LIMA1</i>    | 0.54 | <i>ACLY</i>          | 0.51 | <i>C1orf106</i> | 0.4  | <i>FBXO3</i>      | 0.5  |

|                      |      |                     |      |                       |      |                 |      |                 |      |                |      |
|----------------------|------|---------------------|------|-----------------------|------|-----------------|------|-----------------|------|----------------|------|
| <i>APLP2</i>         | 0.48 | <i>ITPRIPL1</i>     | 0.33 | <i>VILL</i>           | 0.54 | <i>SUOX</i>     | 0.51 | <i>SGPP2</i>    | 0.4  | <i>RHPN2</i>   | 0.5  |
| <i>AMIGO1</i>        | 0.48 | <i>RP11-15E1.5</i>  | 0.33 | <i>NR3C2</i>          | 0.54 | <i>YIPF1</i>    | 0.51 | <i>CAPN5</i>    | 0.4  | <i>C2orf15</i> | 0.5  |
| <i>KIAA0319L</i>     | 0.48 | <i>PLD1</i>         | 0.32 | <i>AHCYL2</i>         | 0.54 | <i>PTPRF</i>    | 0.51 | <i>KCNE3</i>    | 0.4  | <i>MGAT5</i>   | 0.49 |
| <i>TUBB8P7</i>       | 0.47 | <i>KCNK5</i>        | 0.32 | <i>AOC1</i>           | 0.53 | <i>BCL2L2</i>   | 0.5  | <i>CORO2A</i>   | 0.4  | <i>RNF103</i>  | 0.49 |
| <i>RP11-354M20.3</i> | 0.47 | <i>RP11-389G6.3</i> | 0.32 | <i>CEACAM1</i>        | 0.53 | <i>KIAA1522</i> | 0.5  | <i>CYSTM1</i>   | 0.4  | <i>PLEKHB2</i> | 0.49 |
| <i>WWP2</i>          | 0.47 | <i>ATP1B3</i>       | 0.32 | <i>FAM214B</i>        | 0.53 | <i>AQP11</i>    | 0.5  | <i>NIPAI</i>    | 0.4  | <i>DNAJC27</i> | 0.49 |
| <i>BTBD9</i>         | 0.46 | <i>TMEM211</i>      | 0.32 | <i>RP11-1223D19.3</i> | 0.53 | <i>MIOS</i>     | 0.5  | <i>LLGL2</i>    | 0.4  | <i>CALM2</i>   | 0.49 |
| <i>ORAOVIP1</i>      | 0.46 | <i>ANKRD20A7P</i>   | 0.32 | <i>PEX26</i>          | 0.53 | <i>HLCS</i>     | 0.5  | <i>KCNK5</i>    | 0.4  | <i>FGD4</i>    | 0.49 |
| <i>B3GNT8</i>        | 0.46 | <i>ROR1</i>         | 0.32 | <i>DUOXA2</i>         | 0.53 | <i>ABAT</i>     | 0.5  | <i>ADRA2A</i>   | 0.4  | <i>CASC4</i>   | 0.49 |
| <i>CGNL1</i>         | 0.46 | <i>HMGB3P8</i>      | 0.32 | <i>ITM2C</i>          | 0.53 | <i>COG5</i>     | 0.5  | <i>SEPHS2</i>   | 0.4  | <i>PRSS23</i>  | 0.49 |
| <i>SLC10A2</i>       | 0.46 | <i>SOX9</i>         | 0.32 | <i>FA2H</i>           | 0.53 | <i>FAM219B</i>  | 0.5  | <i>EFCAB14</i>  | 0.4  | <i>PLSCR1</i>  | 0.49 |
| <i>ZNF204P</i>       | 0.46 | <i>GAN</i>          | 0.32 | <i>CORO2A</i>         | 0.53 | <i>BSDC1</i>    | 0.5  | <i>SLC35D1</i>  | 0.4  | <i>EHF</i>     | 0.49 |
| <i>UBTD1</i>         | 0.46 | <i>AC103563.8</i>   | 0.32 | <i>DIRC2</i>          | 0.53 | <i>SAR1B</i>    | 0.5  | <i>DTX4</i>     | 0.4  | <i>SLC34A2</i> | 0.49 |
| <i>SUSD2</i>         | 0.46 | <i>CA13</i>         | 0.32 | <i>PLCE1</i>          | 0.53 | <i>SLC16A9</i>  | 0.5  | <i>KALRN</i>    | 0.4  | <i>NTN4</i>    | 0.49 |
| <i>AP000254.8</i>    | 0.46 | <i>NFIX</i>         | 0.31 | <i>GPT</i>            | 0.53 | <i>SHROOM2</i>  | 0.5  | <i>CDR2L</i>    | 0.4  | <i>SLC30A9</i> | 0.49 |
| <i>PPP2R5A</i>       | 0.45 | <i>MORC1</i>        | 0.31 | <i>GUCA2B</i>         | 0.53 | <i>ELOVL7</i>   | 0.5  | <i>SEC24A</i>   | 0.39 | <i>ITGB1</i>   | 0.49 |
| <i>FNIP2</i>         | 0.45 | <i>CLDN8</i>        | 0.31 | <i>RP11-285E9.6</i>   | 0.52 | <i>CTH</i>      | 0.5  | <i>KIAA1522</i> | 0.39 | <i>SPINT2</i>  | 0.49 |
| <i>RP11-</i>         | 0.45 | <i>MGAT3-AS1</i>    | 0.31 | <i>MXD1</i>           | 0.52 | <i>SRP54</i>    | 0.5  | <i>SLC16A5</i>  | 0.39 | <i>SGPP2</i>   | 0.48 |

## 793H13.3

|                     |      |                     |      |                     |      |                |      |                   |      |                      |      |
|---------------------|------|---------------------|------|---------------------|------|----------------|------|-------------------|------|----------------------|------|
| <i>TMEM50B</i>      | 0.45 | <i>MOGAT2</i>       | 0.31 | <i>CAPN5</i>        | 0.52 | <i>PVRL4</i>   | 0.5  | <i>MGAT4B</i>     | 0.39 | <i>MMP24</i>         | 0.48 |
| <i>RP11-480G3.1</i> | 0.45 | <i>ZNF723P</i>      | 0.31 | <i>TRIM40</i>       | 0.52 | <i>CDS1</i>    | 0.5  | <i>PLEKHB2</i>    | 0.39 | <i>TMEM129</i>       | 0.48 |
| <i>CDKL2</i>        | 0.45 | <i>CHST9</i>        | 0.31 | <i>RIPK3</i>        | 0.52 | <i>DHRS7</i>   | 0.5  | <i>PCYT1A</i>     | 0.39 | <i>RP11-541N10.3</i> | 0.48 |
| <i>NR3C2</i>        | 0.45 | <i>KSR1</i>         | 0.31 | <i>RP11-867O8.5</i> | 0.52 | <i>PIP4K2C</i> | 0.5  | <i>SMAD6</i>      | 0.39 | <i>ALI62759.1</i>    | 0.48 |
| <i>AGL</i>          | 0.45 | <i>RP11-310P5.2</i> | 0.31 | <i>KLF4</i>         | 0.52 | <i>TEX261</i>  | 0.5  | <i>CLINT1</i>     | 0.39 | <i>ITGB1P1</i>       | 0.48 |
| <i>CABIN1</i>       | 0.45 | <i>BHMT</i>         | 0.31 | <i>JOSD1</i>        | 0.51 | <i>PMEPA1</i>  | 0.5  | <i>AC234582.1</i> | 0.39 | <i>ACTR1B</i>        | 0.48 |
| <i>IVD</i>          | 0.45 | <i>LONRF3</i>       | 0.31 | <i>DOK4</i>         | 0.51 | <i>BCAS1</i>   | 0.49 | <i>RETSAT</i>     | 0.39 | <i>KIAA1671</i>      | 0.48 |
| <i>DDAH1</i>        | 0.45 | <i>RP3-449O17.1</i> | 0.31 | <i>RNF186</i>       | 0.51 | <i>DCAF11</i>  | 0.49 | <i>OCN</i>        | 0.39 | <i>ARHGEF38</i>      | 0.48 |
| <i>CYTH3</i>        | 0.45 | <i>RP11-23P13.6</i> | 0.3  | <i>PCSK7</i>        | 0.51 | <i>TTC7B</i>   | 0.49 | <i>WDR55</i>      | 0.39 | <i>NAPG</i>          | 0.48 |
| <i>NKX2-1</i>       | 0.45 | <i>RNF217-AS1</i>   | 0.3  | <i>MGLL</i>         | 0.51 | <i>SLC35A3</i> | 0.49 | <i>TMEM125</i>    | 0.39 | <i>PCDHGB5</i>       | 0.48 |
| <i>AP2A2</i>        | 0.45 | <i>TMEM71</i>       | 0.3  | <i>FZD5</i>         | 0.51 | <i>SORD2P</i>  | 0.49 | <i>TSPAN15</i>    | 0.38 | <i>OCN</i>           | 0.48 |
| <i>ADGRF5</i>       | 0.45 | <i>IVNS1ABP</i>     | 0.3  | <i>LRRC19</i>       | 0.51 | <i>RREB1</i>   | 0.49 | <i>BMP2</i>       | 0.38 | <i>CD82</i>          | 0.48 |
| <i>UBE2G2</i>       | 0.44 | <i>CTD-</i>         | 0.3  | <i>LIPH</i>         | 0.51 | <i>ABHD3</i>   | 0.49 | <i>PIP5K1B</i>    | 0.38 | <i>DSTN</i>          | 0.48 |
|                     |      | <i>2017D15.1</i>    |      |                     |      |                |      |                   |      |                      |      |
| <i>RP11-55C6.1</i>  | 0.44 | <i>PKP1</i>         | 0.3  | <i>C1orf210</i>     | 0.51 | <i>FITM2</i>   | 0.49 | <i>CXCL16</i>     | 0.38 | <i>SDC4</i>          | 0.48 |
| <i>MAPK10</i>       | 0.44 | <i>LGALS3</i>       | 0.3  | <i>AC007556.3</i>   | 0.51 | <i>PPAPDC2</i> | 0.49 | <i>AC107399.1</i> | 0.38 | <i>LRBA</i>          | 0.48 |
| <i>GANC</i>         | 0.44 | <i>RP11-169D4.2</i> | 0.3  | <i>GLRA4</i>        | 0.51 | <i>R3HDM2</i>  | 0.49 | <i>RP11-</i>      | 0.38 | <i>AC006273.5</i>    | 0.48 |
|                     |      |                     |      |                     |      |                |      | <i>867G23.2</i>   |      |                      |      |
| <i>TMEM63A</i>      | 0.44 | <i>TEX12</i>        | 0.3  | <i>STYK1</i>        | 0.5  | <i>OCIAD1</i>  | 0.49 | <i>KIAA0319L</i>  | 0.38 | <i>KIF3B</i>         | 0.48 |

|                      |      |                   |      |                   |      |                 |      |                     |      |                      |      |
|----------------------|------|-------------------|------|-------------------|------|-----------------|------|---------------------|------|----------------------|------|
| <i>PRMT2</i>         | 0.44 | <i>SLC39A2</i>    | 0.3  | <i>BCAS1</i>      | 0.5  | <i>TPD52</i>    | 0.49 | <i>GUCD1</i>        | 0.38 | <i>ELF3</i>          | 0.48 |
| <i>SELENBP1</i>      | 0.44 | <i>PPM1L</i>      | 0.3  | <i>GUCA2A</i>     | 0.5  | <i>BTD</i>      | 0.49 | <i>ELF3</i>         | 0.38 | <i>RP11-728F11.4</i> | 0.47 |
| <i>PFKFB2</i>        | 0.44 | <i>TRIM2</i>      | 0.3  | <i>F2RL1</i>      | 0.5  | <i>ADIPOR2</i>  | 0.49 | <i>TMEM87B</i>      | 0.38 | <i>EPN3</i>          | 0.47 |
| <i>TMEM63B</i>       | 0.44 | <i>AC007787.3</i> | 0.3  | <i>TMEM82</i>     | 0.5  | <i>VPS37C</i>   | 0.49 | <i>MUC1</i>         | 0.38 | <i>ACVR1B</i>        | 0.47 |
| <i>RNF175</i>        | 0.44 | <i>SUN2</i>       | 0.29 | <i>GCNT3</i>      | 0.5  | <i>TBL1Y</i>    | 0.49 | <i>CLIC6</i>        | 0.38 | <i>CXorf23</i>       | 0.47 |
| <i>ESAM</i>          | 0.44 | <i>AC012485.2</i> | 0.29 | <i>CDS1</i>       | 0.5  | <i>ZBTB42</i>   | 0.49 | <i>PTPRH</i>        | 0.38 | <i>DMTN</i>          | 0.47 |
| <i>CH507-396I9.7</i> | 0.44 | <i>RHOV</i>       | 0.29 | <i>KIAA1522</i>   | 0.5  | <i>PLA2G12A</i> | 0.49 | <i>ZDHHC7</i>       | 0.38 | <i>SH2D3A</i>        | 0.47 |
| <i>LRRC75B</i>       | 0.44 | <i>MALL</i>       | 0.29 | <i>BDKRB2</i>     | 0.5  | <i>PIGH</i>     | 0.49 | <i>CDS1</i>         | 0.38 | <i>GBAS</i>          | 0.47 |
| <i>IGKV1OR2-1</i>    | 0.44 | <i>YWHABP1</i>    | 0.29 | <i>TMEM63B</i>    | 0.5  | <i>ZADH2</i>    | 0.49 | <i>CGN</i>          | 0.38 | <i>ABII</i>          | 0.47 |
| <i>ACSSI</i>         | 0.44 | <i>LINC01133</i>  | 0.29 | <i>LINC01559</i>  | 0.5  | <i>ZNF532</i>   | 0.49 | <i>RP11-528A4.2</i> | 0.38 | <i>ANXA9</i>         | 0.47 |
| <i>HOXD1</i>         | 0.44 | <i>GXYLTIP4</i>   | 0.29 | <i>USP53</i>      | 0.49 | <i>MORC4</i>    | 0.49 | <i>PRKCD</i>        | 0.38 | <i>RP11-563J2.2</i>  | 0.47 |
| <i>HLF</i>           | 0.44 | <i>SDHD</i>       | 0.29 | <i>SLC35D1</i>    | 0.49 | <i>ARG2</i>     | 0.49 | <i>FUT8</i>         | 0.38 | <i>FAM201A</i>       | 0.47 |
| <i>MYLK4</i>         | 0.44 | <i>ARHGEF37</i>   | 0.29 | <i>ATP10B</i>     | 0.49 | <i>GREB1</i>    | 0.49 | <i>MUC3A</i>        | 0.38 | <i>LITAF</i>         | 0.47 |
| <i>ANKRD44</i>       | 0.44 | <i>LIPI</i>       | 0.29 | <i>PIGR</i>       | 0.49 | <i>PHF8</i>     | 0.49 | <i>RP11-413E1.2</i> | 0.37 | <i>TMEM87A</i>       | 0.47 |
| <i>RP13-514E23.1</i> | 0.43 | <i>COX20P2</i>    | 0.29 | <i>SIRT6</i>      | 0.49 | <i>ALDH1A3</i>  | 0.49 | <i>ZDHHC23</i>      | 0.37 | <i>RP11-206M11.7</i> | 0.47 |
| <i>COL4A4</i>        | 0.43 | <i>PCDHB17P</i>   | 0.29 | <i>SOWAHB</i>     | 0.49 | <i>SLC33A1</i>  | 0.48 | <i>GPRC5C</i>       | 0.37 | <i>MARVELD3</i>      | 0.47 |
| <i>FAAH</i>          | 0.43 | <i>INHBB</i>      | 0.29 | <i>SLC22A18AS</i> | 0.49 | <i>TUSC3</i>    | 0.48 | <i>CYFIP1</i>       | 0.37 | <i>ATP8B1</i>        | 0.47 |

---

BRCA, breast invasive carcinoma; COAD, colon adenocarcinoma; LIHC, liver hepatocellular carcinoma; LUAD, lung adenocarcinoma; PCC, Pearson correlation coefficient; PRAD, prostate adenocarcinoma; STAD, stomach adenocarcinoma; TMPRSS2, transmembrane serine protease 2.
