# Supplementary material for: Genetic Susceptibility of ACE2 and TMPRSS2 in Six Common Cancers and Possible Impacts on COVID-19
Source: PubMed Central journal article supplement — Cancer Res Treat. 2020 Dec 29;53(3):650–6. doi: 10.4143/crt.2020.950 (PMC8291170; doi:10.4143/crt.2020.950), 2020-12-29
Supplement: crt-2020-950-suppl3.pdf [file crt-2020-950-suppl3.pdf]

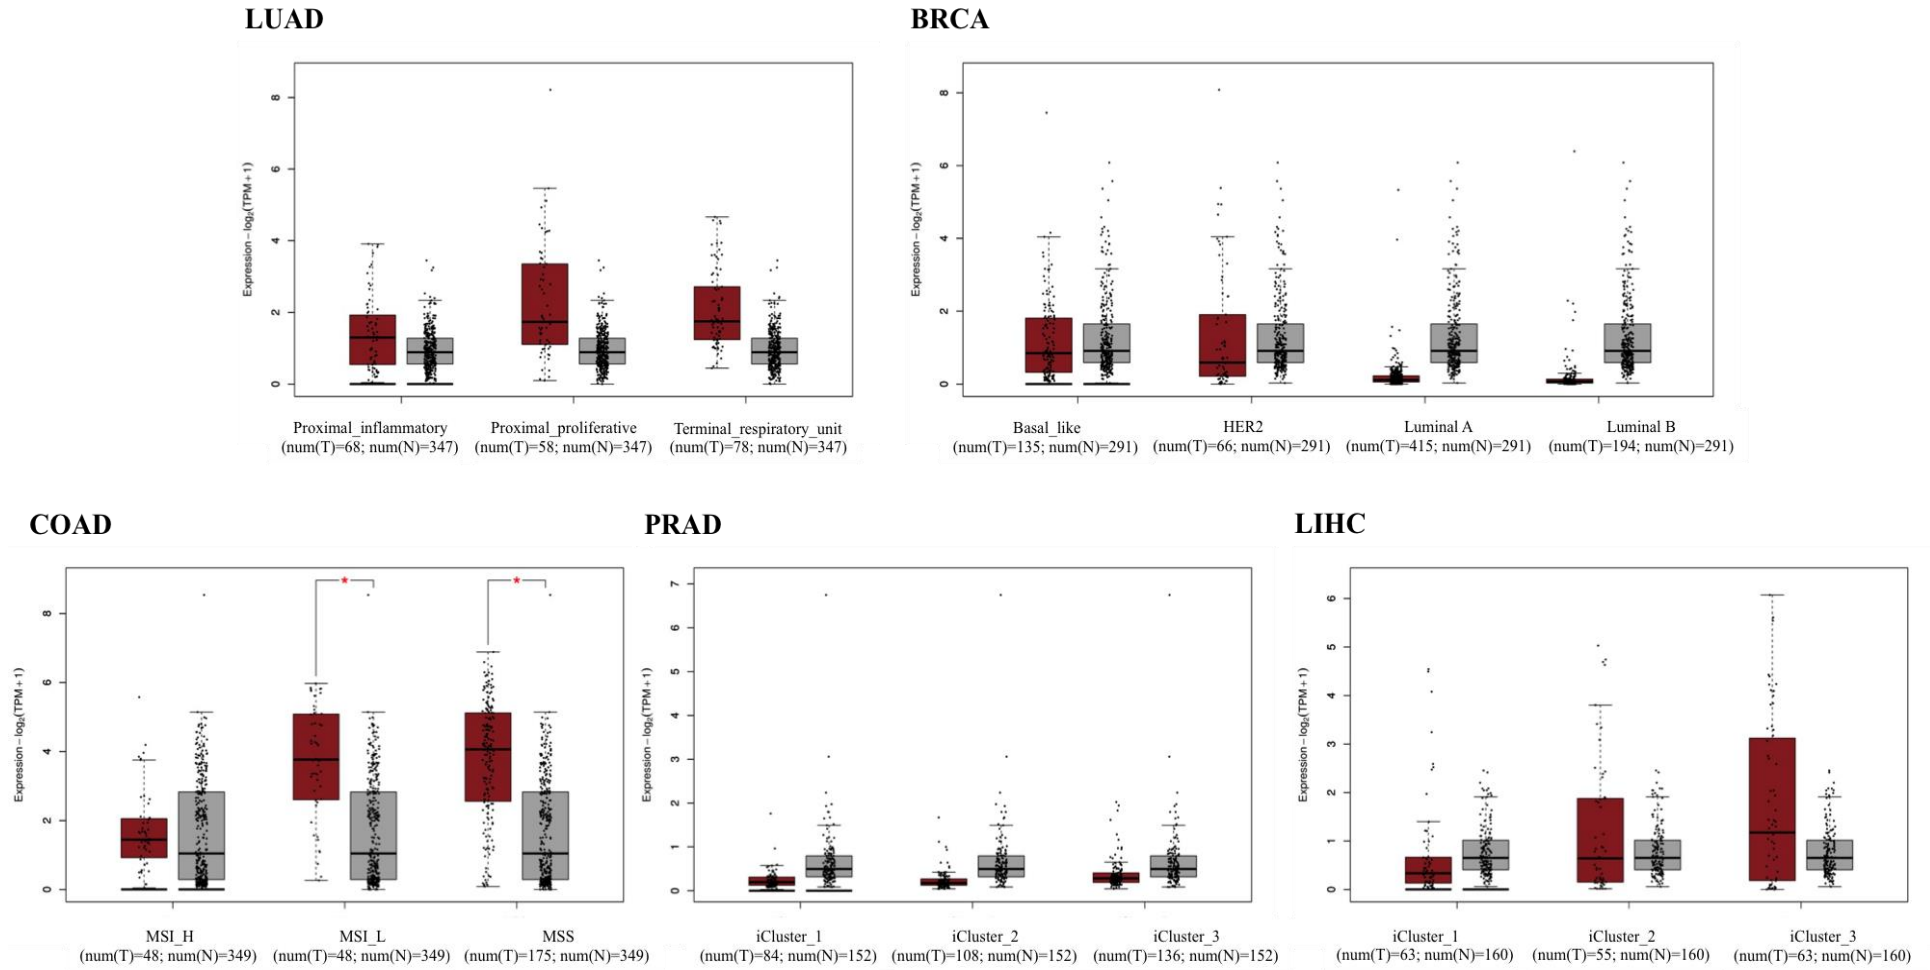

**S3 Fig.** Comparison of ACE2 expression between cancer subtypes and control. ACE2, angiotensin-converting enzyme 2; BRCA, breast invasive carcinoma; COAD, colon adenocarcinoma; LIHC, liver hepatocellular carcinoma; LUAD, lung adenocarcinoma; PRAD, prostate adenocarcinoma.
