# Supplementary material for: Genetic Susceptibility of ACE2 and TMPRSS2 in Six Common Cancers and Possible Impacts on COVID-19
Source: PubMed Central journal article supplement — Cancer Res Treat. 2020 Dec 29;53(3):650–6. doi: 10.4143/crt.2020.950 (PMC8291170; doi:10.4143/crt.2020.950), 2020-12-29
Supplement: crt-2020-950-suppl7.pdf [file crt-2020-950-suppl7.pdf]

### LUAD

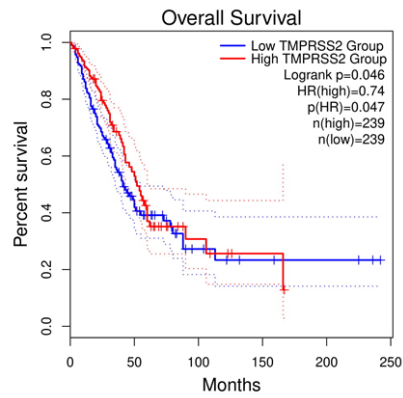

### BRCA

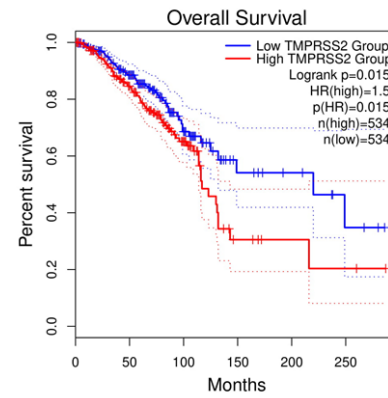

### COAD

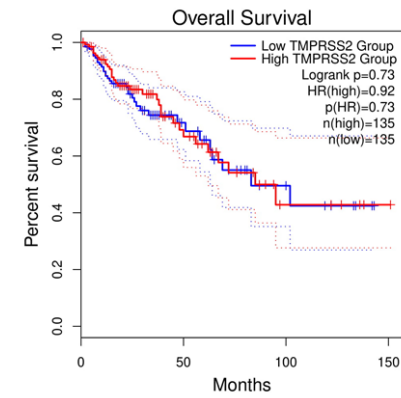

### PRAD

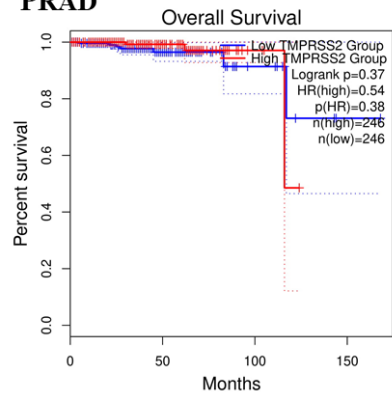

### STAD

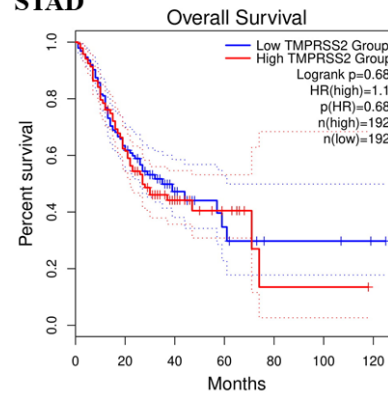

### LIHC

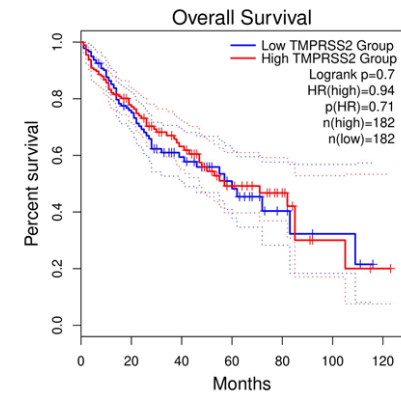

**S7 Fig.** Overall survival among groups of high and low TMPRSS2 expression. BRCA, breast invasive carcinoma; COAD, colon adenocarcinoma; LIHC, liver hepatocellular carcinoma; LUAD, lung adenocarcinoma; PRAD, prostate adenocarcinoma; STAD, stomach adenocarcinoma; TMPRSS2, transmembrane serine protease 2.
