# Supplementary material for: Genetic Susceptibility of ACE2 and TMPRSS2 in Six Common Cancers and Possible Impacts on COVID-19
Source: PubMed Central journal article supplement — Cancer Res Treat. 2020 Dec 29;53(3):650–6. doi: 10.4143/crt.2020.950 (PMC8291170; doi:10.4143/crt.2020.950), 2020-12-29
Supplement: crt-2020-950-suppl9.pdf [file crt-2020-950-suppl9.pdf]

**S9 Table.** Significant KEGG pathways of ACE2 and top 100 similar genes in different tumors

| Tumor                            | Pathway                                 | Gene                                    | p-value | Adjusted p-value | Odds ratio | Combined score |
|----------------------------------|-----------------------------------------|-----------------------------------------|---------|------------------|------------|----------------|
| <b>Lung adenocarcinoma</b>       |                                         |                                         |         |                  |            |                |
|                                  | Phenylalanine metabolism                | <i>MAOA, ALDH3B1</i>                    | 0.003   | > 0.99           | 23.30      | 133.34         |
|                                  | Histidine metabolism                    | <i>MAOA, ALDH3B1</i>                    | 0.006   | 0.918            | 17.22      | 88.20          |
|                                  | beta-Alanine metabolism                 | <i>ALDH6A1, ALDH3B1</i>                 | 0.011   | > 0.99           | 12.78      | 58.00          |
|                                  | Propanoate metabolism                   | <i>ALDH6A1, SUCLG2</i>                  | 0.011   | 0.874            | 12.38      | 55.43          |
|                                  | Tyrosine metabolism                     | <i>ASH2L</i>                            | 0.014   | 0.876            | 11.00      | 46.78          |
| <b>Breast invasive carcinoma</b> |                                         |                                         |         |                  |            |                |
|                                  | Tryptophan metabolism                   | <i>AADAT, HAAO, KYNU</i>                | 0.001   | 0.383            | 14.14      | 94.62          |
|                                  | PPAR signaling pathway                  | <i>FABP6, FABP7, DBI</i>                | 0.006   | 0.963            | 8.03       | 40.74          |
|                                  | Arachidonic acid metabolism             | <i>GGT1, ALOX15B</i>                    | 0.040   | > 0.99           | 6.29       | 20.17          |
| <b>Colon adenocarcinoma</b>      |                                         |                                         |         |                  |            |                |
|                                  | Vitamin digestion and absorption        | <i>SLC5A6, SCARB1, SLC23A1, SLC19A3</i> | <0.001  | 0.002            | 33.00      | 396.70         |
|                                  | Sulfur relay system                     | <i>NFS1, MOCS3</i>                      | 0.001   | 0.107            | 49.50      | 360.11         |
|                                  | Fat digestion and absorption            | <i>SCARB1, PLA2G12B, DGAT2</i>          | 0.001   | 0.119            | 14.49      | 97.95          |
|                                  | Renin-angiotensin system                | <i>ACE2, AGT</i>                        | 0.006   | 0.459            | 17.22      | 88.20          |
|                                  | Progesterone-mediated oocyte maturation | <i>RPS6KA3, RPS6KA6, AURKA</i>          | 0.014   | 0.851            | 6.00       | 25.69          |

|                                          |                                |       |        |       |        |
|------------------------------------------|--------------------------------|-------|--------|-------|--------|
| Insulin resistance                       | <i>RPS6KA3, RPS6KA6, AGT</i>   | 0.017 | 0.894  | 5.50  | 22.28  |
| Bladder cancer                           | <i>SRC, MYC</i>                | 0.018 | 0.802  | 9.66  | 38.69  |
| Proteasome                               | <i>ADRM1, PSMA7</i>            | 0.022 | 0.836  | 8.80  | 33.71  |
| Oocyte meiosis                           | <i>RPS6KA3, RPS6KA6, AURKA</i> | 0.026 | 0.873  | 4.75  | 17.44  |
| Cholesterol metabolism                   | <i>SCARB1, VAPB</i>            | 0.026 | 0.814  | 7.92  | 28.78  |
| Central carbon metabolism in cancer      | <i>PDHA1, MYC</i>              | 0.043 | > 0.99 | 6.09  | 19.21  |
| Cortisol synthesis and secretion         | <i>SCARB1, AGT</i>             | 0.043 | > 0.99 | 6.09  | 19.21  |
| Acute myeloid leukemia                   | <i>CEBPA, MYC</i>              | 0.044 | > 0.99 | 6.00  | 18.75  |
| Long-term potentiation                   | <i>RPS6KA3, RPS6KA6</i>        | 0.045 | 0.993  | 5.91  | 18.31  |
| <b>Prostate adenocarcinoma</b>           |                                |       |        |       |        |
| Steroid hormone biosynthesis             | <i>UGT1A1, AKR1C3, UGT1A6</i>  | 0.003 | > 0.99 | 9.90  | 56.07  |
| Ascorbate and aldarate metabolism        | <i>UGT1A1, UGT1A6</i>          | 0.008 | > 0.99 | 14.67 | 70.53  |
| Pentose and glucuronate interconversions | <i>UGT1A1, UGT1A6</i>          | 0.013 | > 0.99 | 11.65 | 50.81  |
| Porphyrin and chlorophyll metabolism     | <i>UGT1A1, UGT1A6</i>          | 0.019 | > 0.99 | 9.43  | 37.34  |
| Glycerolipid metabolism                  | <i>DGAT2, GK</i>               | 0.038 | > 0.99 | 6.49  | 21.21  |
| Arachidonic acid metabolism              | <i>PLA2G16, AKR1C3</i>         | 0.040 | > 0.99 | 6.29  | 20.17  |
| Retinol metabolism                       | <i>UGT1A1, UGT1A6</i>          | 0.045 | > 0.99 | 5.91  | 18.31  |
| <b>Stomach adenocarcinoma</b>            |                                |       |        |       |        |
| Fat digestion and absorption             | <i>FABP1, MTP, APOA4</i>       | 0.001 | 0.337  | 14.78 | 100.78 |
| Vitamin digestion and absorption         | <i>RBP2, APOA4</i>             | 0.006 | 0.960  | 16.84 | 85.48  |

---

| <b>Liver hepatocellular carcinoma</b> |                     |       |        |       |       |
|---------------------------------------|---------------------|-------|--------|-------|-------|
| Renin-angiotensin system              | <i>ACE2, MME</i>    | 0.006 | > 0.99 | 17.22 | 88.20 |
| Amphetamine addiction                 | <i>MAOB, CAMK2A</i> | 0.046 | > 0.99 | 5.82  | 17.89 |

---

ACE2, angiotensin-converting enzyme 2; KEGG, Kyoto Encyclopedia of Genes and Genomes.
